# Supplementary material
Source: Springer Nature journal article supplement (https://www.springermedizin.de/resource/supplementary/12877_2010_586_MOESM1_ESM.pdf/9439914)
Supplement: MOESM1 [file 9439914]

**The older adult's  
experience of home**

**The Home is the place the  
older adult can not imagine  
living without**

The home, is built with others, it is the place closest to the heart, where the older adult is at home, one's stronghold and place of freedom that has a special atmosphere

**The Home is the place the  
older adult might be forced  
to leave**

The day when there is no other way out - the day the older adult doesn't want to think about

**The well known**

-The place, closest to the heart where the older adult is at home

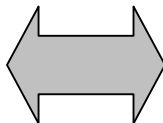

**The unknown**

-The day when there is no other way out
